# Supplementary material
Source: PubMed Central journal article supplement (PMC5243203)
Supplement: Supplemental_Tables_and_Figures.pdf [file Supplemental_Tables_and_Figures.pdf]

Figure 1

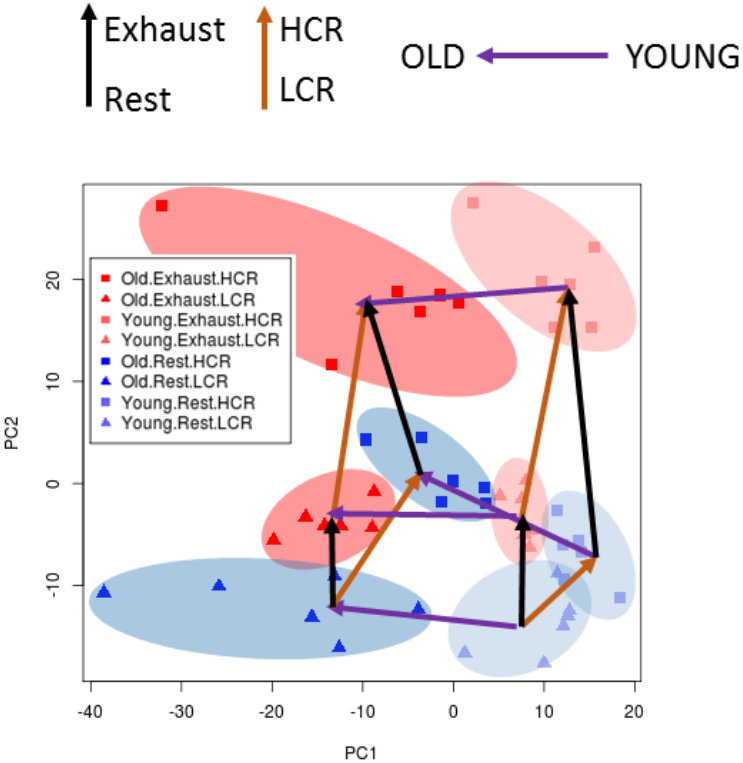

Figure 2

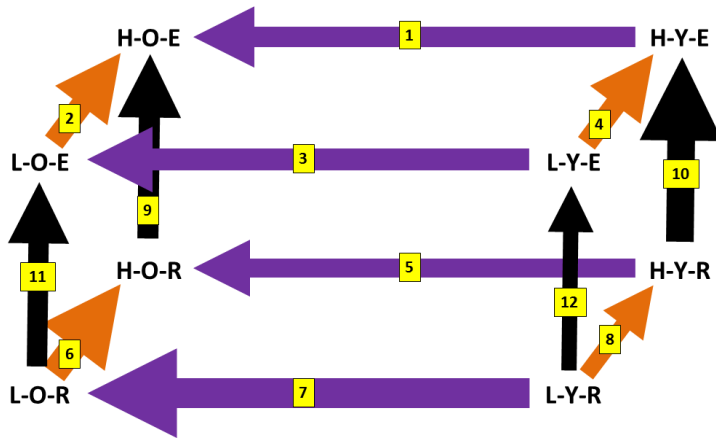

# Figure 3

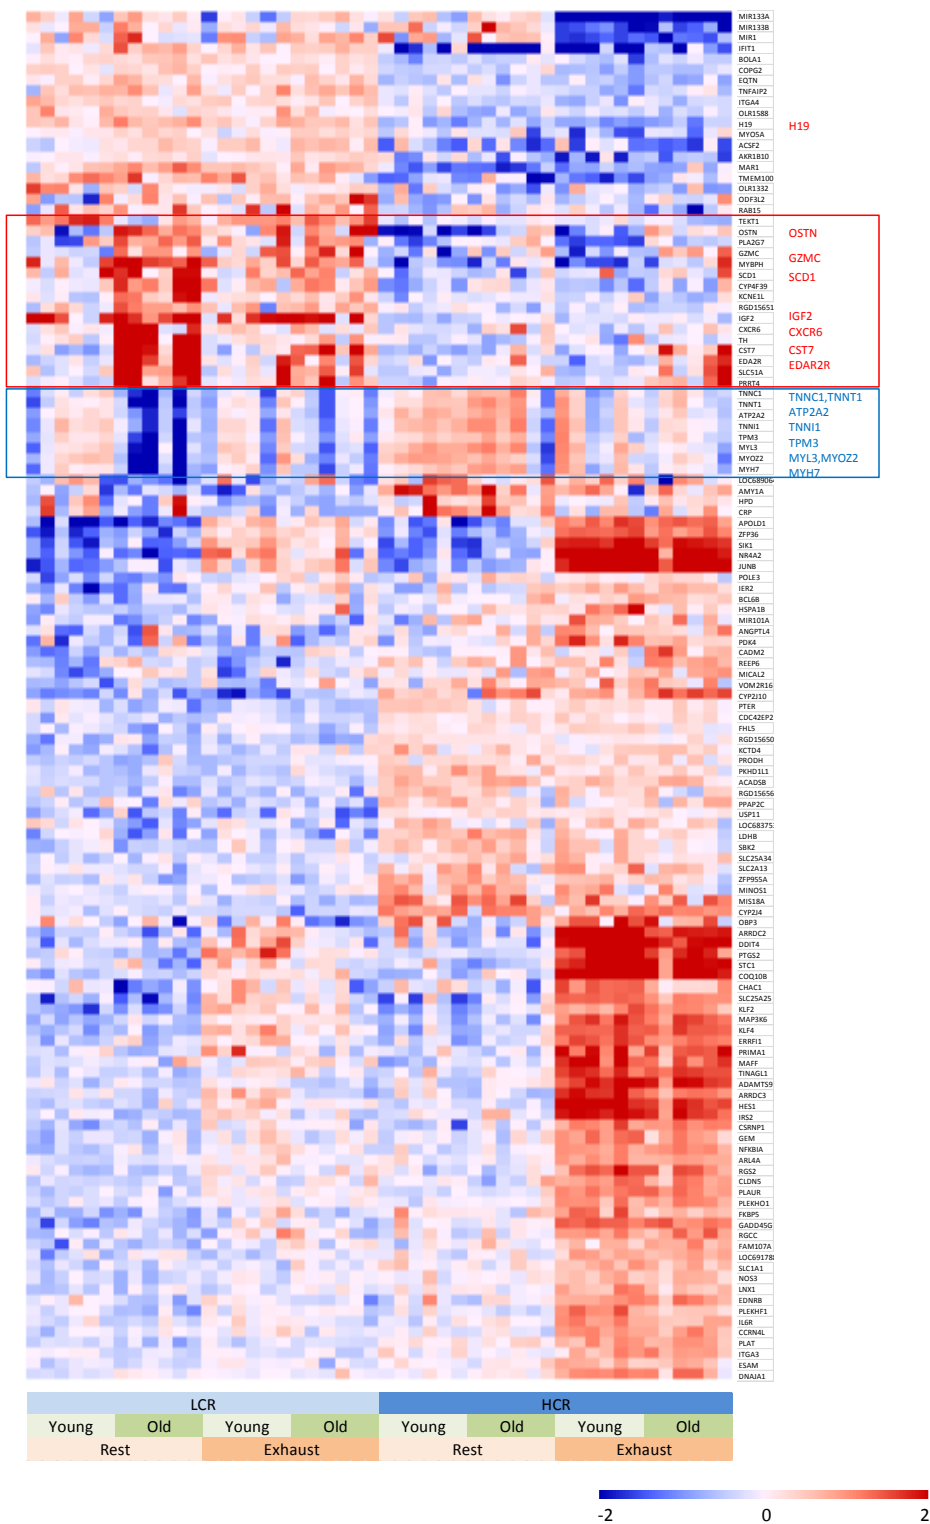

# Figure 4

## Line genes, GO Biological Processes

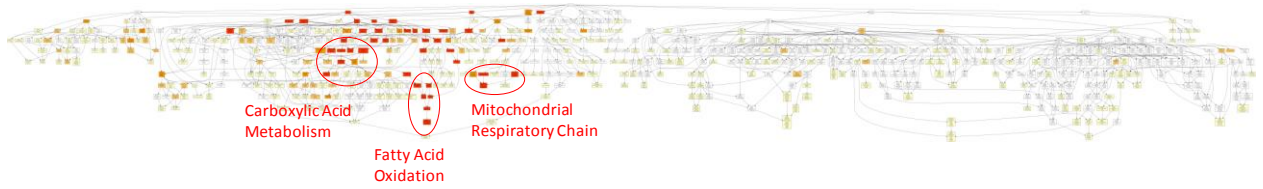

## Age genes, GO Biological Processes

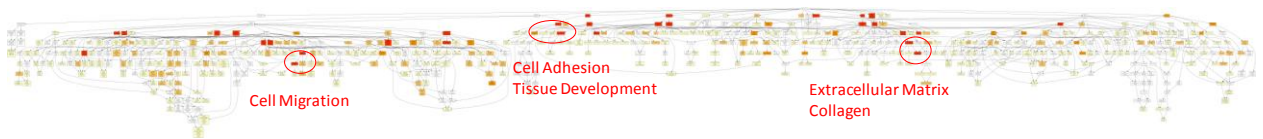

## Exercise genes, GO Biological Processes

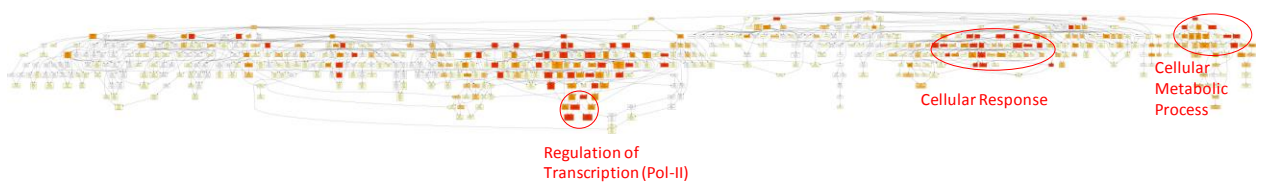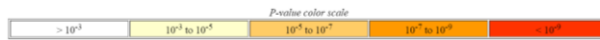

# Figure 5

a

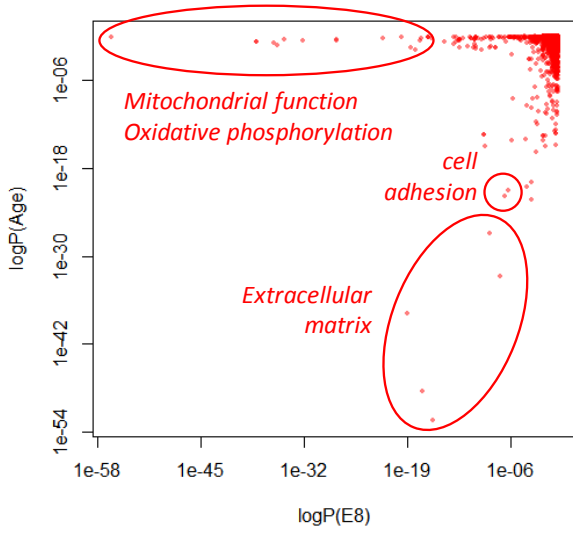

b

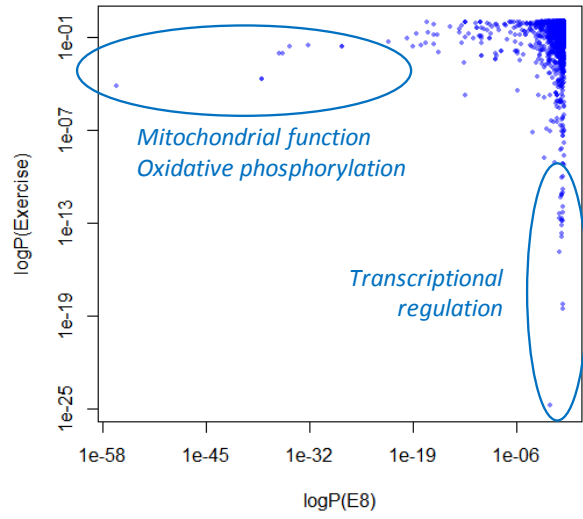

| Name             |                          | fatty acid oxidation | carboxylic acid catabolic process | carboxylic acid metabolic process | mitochondrial respiratory chain | cell migration | cell adhesion | extracellular matrix | collagen | regulation of transcription from RNA polymerase II promoter | cellular response to chemical stimulus | positive regulation of cellular metabolic process | negative regulation of cellular metabolic process |
|------------------|--------------------------|----------------------|-----------------------------------|-----------------------------------|---------------------------------|----------------|---------------|----------------------|----------|-------------------------------------------------------------|----------------------------------------|---------------------------------------------------|---------------------------------------------------|
| # Genes          |                          | 59                   | 110                               | 535                               | 59                              | 388            | 628           | 298                  | 25       | 624                                                         | 371                                    | 850                                               | 651                                               |
| <b>log(P,10)</b> |                          |                      |                                   |                                   |                                 |                |               |                      |          |                                                             |                                        |                                                   |                                                   |
| line             | HCR-LCR                  | 8.4                  | 15.0                              | 17.4                              | 19.0                            | 0.1            | 3.4           | 0.9                  | 1.4      | 0.1                                                         | 0.3                                    | 0.2                                               | 0.2                                               |
| E2               | HCR-LCR Old,Exhausted    | 1.7                  | 4.6                               | 5.9                               | 1.3                             | 5.2            | 2.0           | 6.1                  | 0.2      | 0.9                                                         | 2.2                                    | 0.8                                               | 1.1                                               |
| E4               | HCR-LCR Young,Exhausted  | 4.6                  | 8.0                               | 11.0                              | 5.7                             | 4.3            | 7.4           | 1.3                  | 2.2      | 0.4                                                         | 0.0                                    | 1.1                                               | 1.3                                               |
| E6               | HCR-LCR Old,Rest         | 2.3                  | 4.7                               | 3.4                               | 15.7                            | 0.5            | 0.7           | 0.8                  | 0.2      | 0.7                                                         | 0.4                                    | 0.1                                               | 0.1                                               |
| E8               | HCR-LCR Young,Rest       | 6.4                  | 9.5                               | 10.0                              | 17.7                            | 2.6            | 11.5          | 17.2                 | 7.5      | 0.3                                                         | 2.4                                    | 0.9                                               | 0.1                                               |
| age              | Old-Young                | 0.2                  | 0.4                               | 2.4                               | 0.3                             | 5.4            | 16.0          | 55.1                 | 23.0     | 7.0                                                         | 1.2                                    | 2.0                                               | 6.2                                               |
| E1               | Old-Young HCR,Exhausted  | 2.6                  | 1.0                               | 3.3                               | 0.0                             | 0.1            | 1.7           | 27.1                 | 12.2     | 1.7                                                         | 1.0                                    | 1.7                                               | 1.4                                               |
| E3               | Old-Young LCR,Exhausted  | 0.1                  | 0.5                               | 0.3                               | 2.4                             | 13.6           | 22.2          | 50.5                 | 19.1     | 1.0                                                         | 2.4                                    | 0.6                                               | 1.3                                               |
| E5               | Old-Young HCR,Rest       | 0.1                  | 0.9                               | 4.1                               | 0.1                             | 0.8            | 4.0           | 18.0                 | 8.9      | 11.6                                                        | 0.6                                    | 3.5                                               | 7.1                                               |
| E7               | Old-Young LCR,Rest       | 0.2                  | 0.3                               | 2.0                               | 0.6                             | 4.3            | 10.3          | 33.9                 | 17.7     | 5.5                                                         | 1.7                                    | 1.9                                               | 4.3                                               |
| exercise         | Exhausted-Rest           | 0.3                  | 0.5                               | 3.0                               | 0.5                             | 3.1            | 1.8           | 3.2                  | 0.0      | 21.4                                                        | 8.4                                    | 8.6                                               | 9.0                                               |
| E9               | Exhausted-Rest HCR,Old   | 3.5                  | 1.4                               | 2.0                               | 5.8                             | 3.0            | 2.7           | 4.2                  | 0.1      | 5.5                                                         | 3.6                                    | 2.8                                               | 2.9                                               |
| E10              | Exhausted-Rest HCR,Young | 0.1                  | 0.2                               | 1.0                               | 3.0                             | 0.6            | 1.2           | 7.7                  | 0.7      | 13.4                                                        | 6.4                                    | 3.5                                               | 7.1                                               |
| E11              | Exhausted-Rest LCR,Old   | 0.4                  | 0.4                               | 0.8                               | 6.2                             | 0.1            | 0.7           | 1.7                  | 0.6      | 6.1                                                         | 2.0                                    | 1.7                                               | 1.3                                               |
| E12              | Exhausted-Rest LCR,Young | 0.4                  | 0.8                               | 5.5                               | 0.2                             | 4.1            | 1.9           | 0.6                  | 0.1      | 25.2                                                        | 3.9                                    | 12.2                                              | 9.6                                               |

| Name              |                          | fatty acid oxidation | carboxylic acid catabolic process | carboxylic acid metabolic process | mitochondrial respiratory chain | cell migration | cell adhesion | extracellular matrix | collagen | regulation of transcription from RNA polymerase II promoter | cellular response to chemical stimulus | positive regulation of cellular metabolic process | negative regulation of cellular metabolic process |
|-------------------|--------------------------|----------------------|-----------------------------------|-----------------------------------|---------------------------------|----------------|---------------|----------------------|----------|-------------------------------------------------------------|----------------------------------------|---------------------------------------------------|---------------------------------------------------|
| # Genes           |                          | 59                   | 110                               | 535                               | 59                              | 388            | 628           | 298                  | 25       | 624                                                         | 371                                    | 850                                               | 651                                               |
| <b>Odds Ratio</b> |                          |                      |                                   |                                   |                                 |                |               |                      |          |                                                             |                                        |                                                   |                                                   |
| line              | HCR-LCR                  | 1.98                 | 2.01                              | 1.56                              | 2.54                            | 0.97           | 0.80          | 0.87                 | 0.54     | 1.02                                                        | 1.04                                   | 0.98                                              | 1.03                                              |
| E2                | HCR-LCR Old,Exhausted    | 2.07                 | 2.54                              | 1.75                              | 1.90                            | 1.82           | 1.34          | 2.06                 | 1.25     | 1.19                                                        | 1.47                                   | 1.15                                              | 1.22                                              |
| E4                | HCR-LCR Young,Exhausted  | 2.90                 | 2.94                              | 1.99                              | 3.24                            | 0.57           | 0.55          | 0.74                 | 0.26     | 1.10                                                        | 1.01                                   | 0.85                                              | 1.22                                              |
| E6                | HCR-LCR Old,Rest         | 2.35                 | 2.55                              | 1.49                              | 7.68                            | 1.14           | 0.86          | 0.81                 | 0.80     | 1.15                                                        | 1.11                                   | 1.02                                              | 1.04                                              |
| E8                | HCR-LCR Young,Rest       | 4.59                 | 4.20                              | 2.20                              | 10.47                           | 0.63           | 0.42          | 0.23                 | 0.08     | 0.91                                                        | 0.63                                   | 0.85                                              | 0.97                                              |
| age               | Old-Young                | 0.93                 | 0.91                              | 0.86                              | 1.15                            | 0.78           | 0.70          | 0.48                 | 0.37     | 1.37                                                        | 0.89                                   | 1.13                                              | 1.34                                              |
| E1                | Old-Young HCR,Exhausted  | 0.41                 | 0.66                              | 0.65                              | 0.96                            | 1.04           | 0.76          | 0.24                 | 0.14     | 1.33                                                        | 0.78                                   | 1.28                                              | 1.29                                              |
| E3                | Old-Young LCR,Exhausted  | 0.93                 | 1.31                              | 0.94                              | 2.76                            | 0.42           | 0.40          | 0.19                 | 0.08     | 1.20                                                        | 0.69                                   | 0.91                                              | 1.24                                              |
| E5                | Old-Young HCR,Rest       | 1.13                 | 0.67                              | 0.62                              | 0.94                            | 0.82           | 0.65          | 0.28                 | 0.10     | 2.18                                                        | 1.18                                   | 1.42                                              | 1.80                                              |
| E7                | Old-Young LCR,Rest       | 1.19                 | 0.86                              | 0.75                              | 0.68                            | 0.60           | 0.52          | 0.22                 | 0.07     | 1.67                                                        | 0.73                                   | 1.27                                              | 1.55                                              |
| exercise          | Exhausted-Rest           | 0.86                 | 0.85                              | 0.77                              | 0.80                            | 1.28           | 1.17          | 1.33                 | 1.03     | 1.67                                                        | 1.49                                   | 1.36                                              | 1.41                                              |
| E9                | Exhausted-Rest HCR,Old   | 0.29                 | 0.57                              | 0.71                              | 0.21                            | 1.60           | 1.43          | 1.90                 | 1.09     | 1.70                                                        | 1.70                                   | 1.38                                              | 1.45                                              |
| E10               | Exhausted-Rest HCR,Young | 1.06                 | 0.90                              | 0.85                              | 0.39                            | 1.15           | 1.18          | 1.91                 | 1.70     | 1.87                                                        | 1.71                                   | 1.32                                              | 1.57                                              |
| E11               | Exhausted-Rest LCR,Old   | 0.71                 | 1.32                              | 0.81                              | 5.65                            | 1.05           | 0.84          | 0.63                 | 0.47     | 1.92                                                        | 1.55                                   | 1.31                                              | 1.30                                              |
| E12               | Exhausted-Rest LCR,Young | 1.42                 | 0.64                              | 0.51                              | 0.84                            | 1.85           | 1.37          | 1.22                 | 0.87     | 3.45                                                        | 1.83                                   | 2.16                                              | 2.15                                              |

## Supplementary Table 1

LogP and odds ratio of the pathways highlighted in Figure 4 for the 3 overall and 12 stratified main effect analysis.

| geneSymbol | line.pval | line.FC | age.pval | age.FC | exercise.pval | exercise.FC |
|------------|-----------|---------|----------|--------|---------------|-------------|
| CPT1A      | 0.0038    | 0.33    | 0.190    | 0.14   | 0.201         | 0.14        |
| CPT1B      | 9.1E-07   | 0.21    | 0.124    | 0.06   | 0.685         | 0.02        |
| SIRT2      | 0.091     | 0.06    | 0.028    | -0.08  | 0.374         | 0.03        |
| SIRT3      | 0.0085    | 0.18    | 0.0061   | 0.18   | 0.558         | 0.04        |
| SIRT4      | 0.0009    | 0.25    | 0.853    | 0.01   | 0.848         | 0.01        |
| SIRT5      | 1.1E-05   | 0.20    | 0.408    | 0.03   | 0.0092        | -0.11       |
| SIRT6      | 0.282     | 0.05    | 0.481    | -0.03  | 0.323         | 0.04        |
| SIRT7      | 0.025     | 0.15    | 0.453    | -0.05  | 0.899         | 0.01        |
| UTRN       | 2.5E-07   | 0.26    | 1.6E-04  | -0.18  | 0.539         | -0.03       |
| DMD        | 0.403     | -0.03   | 3.7E-12  | 0.38   | 0.622         | -0.02       |
| PPARA      | 4.4E-07   | 0.38    | 2.9E-04  | -0.26  | 0.161         | -0.09       |
| PPARD      | 0.0034    | 0.19    | 3.6E-05  | -0.28  | 0.045         | 0.13        |
| PPARGC1A   | 0.077     | 0.13    | 0.086    | -0.12  | 0.814         | -0.02       |
| PPARGC1B   | 1.3E-06   | 0.24    | 0.198    | 0.06   | 0.344         | 0.04        |
| NDUFA1     | 0.0006    | 0.18    | 0.423    | 0.04   | 0.544         | -0.03       |
| NDUFA10    | 0.024     | 0.20    | 0.0022   | -0.28  | 0.136         | -0.13       |
| NDUFA10    | 9.3E-07   | 0.18    | 0.053    | -0.06  | 0.0037        | -0.10       |
| NDUFA11    | 1.5E-04   | 0.19    | 0.895    | 0.01   | 0.456         | 0.03        |
| NDUFA12    | 0.0017    | 0.17    | 0.365    | 0.05   | 0.547         | -0.03       |
| NDUFA13    | 8.7E-06   | 0.34    | 0.053    | 0.14   | 0.022         | 0.16        |
| NDUFA2     | 0.041     | 0.25    | 0.411    | -0.10  | 0.380         | -0.10       |
| NDUFA3     | 0.279     | 0.06    | 0.034    | 0.12   | 0.920         | 0.01        |
| NDUFA4     | 0.067     | 0.05    | 0.949    | 0.00   | 0.767         | -0.01       |
| NDUFA4L2   | 0.071     | 0.17    | 3.28E-06 | -0.49  | 0.521         | 0.06        |
| NDUFA5     | 3.3E-07   | 0.21    | 0.724    | 0.01   | 0.196         | 0.05        |
| NDUFA6     | 2.4E-04   | 0.25    | 5.91E-05 | 0.27   | 0.017         | 0.15        |
| NDUFA7     | 0.011     | 0.12    | 0.119    | 0.07   | 0.0077        | 0.13        |
| NDUFA8     | 0.049     | 0.08    | 4.5E-04  | -0.14  | 0.027         | -0.09       |
| NDUFA9     | 6.1E-05   | 0.17    | 0.028    | -0.09  | 0.058         | -0.07       |
| NDUFAB1    | 0.065     | 0.10    | 0.562    | -0.03  | 0.509         | -0.04       |
| NDUFAB1    | 0.151     | 0.08    | 0.501    | -0.04  | 0.048         | -0.11       |
| NDUFAB2    | 0.101     | 0.11    | 0.0006   | 0.25   | 0.683         | -0.03       |
| NDUFAB3    | 2.7E-05   | 0.17    | 0.017    | 0.09   | 0.321         | 0.04        |
| NDUFAB4    | 2.3E-04   | 0.26    | 0.083    | 0.11   | 0.656         | -0.03       |
| NDUFAB5    | 1.5E-04   | 0.27    | 0.031    | -0.14  | 0.156         | -0.09       |
| NDUFAB6    | 7.0E-06   | 0.24    | 0.089    | 0.08   | 0.0084        | -0.13       |
| NDUFAB7    | 0.198     | 0.10    | 0.024    | -0.17  | 0.135         | -0.11       |
| NDUFB10    | 9.8E-05   | 0.20    | 0.412    | 0.04   | 0.375         | 0.04        |
| NDUFB11    | 9.8E-06   | 0.20    | 0.711    | -0.01  | 0.064         | 0.08        |
| NDUFB2     | 3.7E-05   | 0.21    | 0.859    | 0.01   | 0.376         | 0.04        |
| NDUFB3     | 0.086     | 0.07    | 0.136    | 0.06   | 0.173         | -0.06       |
| NDUFB3     | 0.376     | 0.03    | 0.641    | 0.01   | 0.002         | -0.10       |
| NDUFB3L    | 0.0013    | 0.13    | 0.123    | 0.06   | 0.504         | 0.03        |
| NDUFB3L    | 0.0013    | 0.13    | 0.123    | 0.06   | 0.504         | 0.03        |
| NDUFB4     | 0.411     | 0.03    | 0.218    | -0.05  | 0.732         | -0.01       |
| NDUFB4L1   | 0.007     | 0.34    | 0.556    | 0.07   | 0.360         | -0.11       |
| NDUFB5     | 0.001     | 0.15    | 0.257    | -0.05  | 0.203         | -0.05       |
| NDUFB6     | 0.002     | 0.18    | 0.874    | 0.01   | 0.974         | 0.00        |
| NDUFB7     | 6.7E-05   | 0.27    | 4.9E-04  | 0.23   | 0.206         | 0.08        |
| NDUFB8     | 2.0E-10   | 0.36    | 0.355    | -0.04  | 0.969         | 0.00        |
| NDUFB9     | 0.019     | 0.08    | 0.062    | -0.06  | 0.780         | 0.01        |
| NDUFC1     | 0.070     | 0.08    | 0.277    | -0.05  | 0.407         | -0.04       |
| NDUFC2     | 0.0053    | 0.09    | 0.620    | -0.01  | 0.0013        | -0.10       |
| NDUFS1     | 1.6E-06   | 0.18    | 0.427    | -0.03  | 0.035         | -0.07       |
| NDUFS3     | 1.1E-04   | 0.22    | 0.797    | 0.01   | 0.605         | -0.03       |
| NDUFS4     | 9.3E-06   | 0.15    | 0.834    | -0.01  | 0.032         | -0.07       |
| NDUFS5     | 0.0093    | 0.21    | 0.515    | 0.05   | 0.553         | -0.05       |
| NDUFS5     | 2.0E-05   | 0.34    | 0.608    | -0.04  | 0.042         | -0.15       |
| NDUFS6     | 0.122     | 0.09    | 0.548    | -0.04  | 0.295         | 0.06        |
| NDUFS7     | 1.2E-11   | 0.30    | 0.246    | -0.04  | 0.728         | -0.01       |
| NDUFS8     | 3.5E-06   | 0.21    | 0.128    | -0.06  | 0.592         | -0.02       |
| NDUFV1     | 3.3E-05   | 0.19    | 0.457    | -0.03  | 0.941         | 0.00        |
| NDUFV2     | 0.0011    | 0.13    | 0.706    | -0.01  | 0.363         | 0.03        |
| NDUFV3     | 0.088     | 0.09    | 0.0011   | 0.18   | 1.1E-06       | 0.29        |
| NDUFV3     | 0.494     | -0.05   | 0.398    | -0.06  | 0.485         | -0.05       |
| TFAM       | 3.9E-03   | 0.11    | 1.9E-03  | 0.12   | 0.888         | -0.01       |
| NFE2L2     | 9.6E-04   | 0.16    | 0.064    | 0.08   | 0.233         | 0.05        |
| MAP1LC3B   | 7.5E-05   | 0.21    | 0.813    | -0.01  | 0.190         | 0.06        |
| MAP1LC3A   | 4.3E-06   | 0.36    | 0.011    | 0.18   | 0.0084        | 0.19        |
| LAMP1      | 2.7E-05   | 0.10    | 0.0011   | 0.08   | 0.171         | 0.03        |
| BECN1      | 0.044     | -0.09   | 0.373    | -0.04  | 0.763         | -0.01       |
| ATG7       | 0.651     | 0.02    | 0.980    | 0.00   | 0.796         | 0.01        |
| MMP14      | 0.468     | 0.07    | 6.4E-07  | -0.52  | 0.343         | -0.09       |
| MMP2       | 0.956     | 0.01    | 8.9E-11  | -0.79  | 0.531         | -0.06       |
| TLR3       | 0.089     | 0.12    | 4.7E-04  | -0.25  | 0.199         | -0.09       |
| TLR4       | 0.053     | -0.14   | 1.1E-04  | -0.29  | 0.213         | 0.09        |
| TLR5       | 0.0084    | -0.27   | 2.0E-04  | -0.40  | 0.942         | -0.01       |
| TLR6       | 2.3E-04   | 0.37    | 0.067    | -0.17  | 0.691         | -0.04       |

## Supplementary Table 2

P-value and fold-change results for select genes that have been reported in literature for their line-, age-, or exercise-effects. Values are extracted from **Supplementary File 1**.

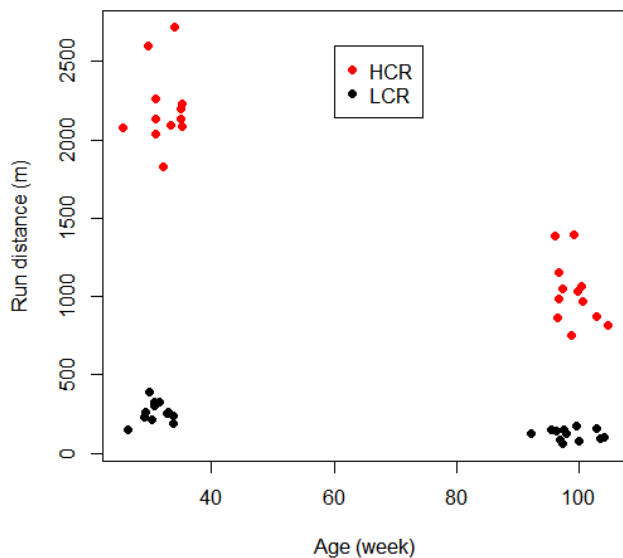

### Supplementary Figure 1.

Distribution of age and running distance at the time of experiment for the 12 old and 12 young animals in each of the two lines.



**a**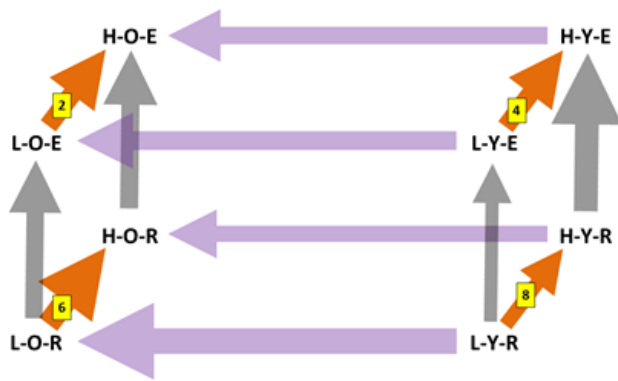

| Side | Comparison                | Euclidean Distance |
|------|---------------------------|--------------------|
| 2    | HCR-LCR   Old,Exhausted   | 33.4               |
| 4    | HCR-LCR   Young,Exhausted | 32.9               |
| 6    | HCR-LCR   Old,Rest        | 36.6               |
| 8    | HCR-LCR   Young,Rest      | 29.2               |

**b**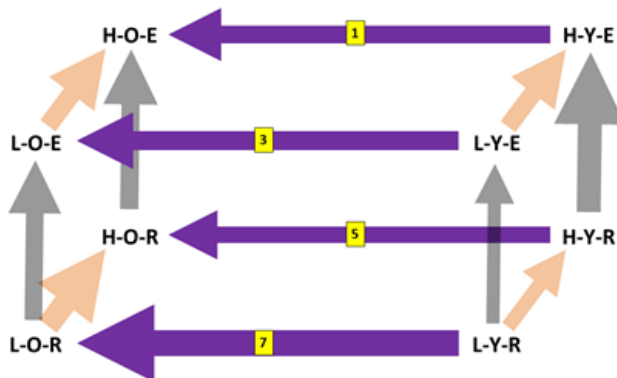

| Side | Comparison                | Euclidean Distance |
|------|---------------------------|--------------------|
| 1    | Old-Young   HCR,Exhausted | 32.4               |
| 3    | Old-Young   LCR,Exhausted | 33.8               |
| 5    | Old-Young   HCR,Rest      | 31.0               |
| 7    | Old-Young   LCR,Rest      | 39.1               |

**c**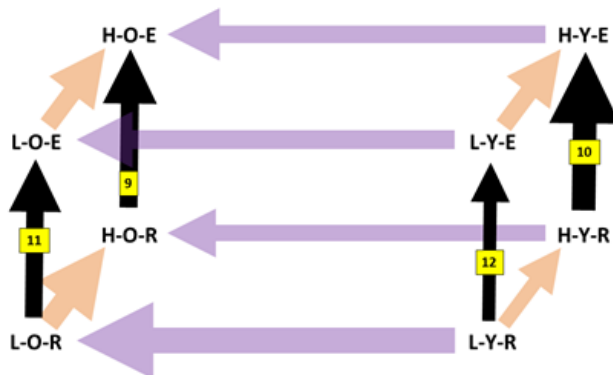

| Side | Comparison                 | Euclidean Distance |
|------|----------------------------|--------------------|
| 9    | Exhausted-Rest   HCR,Old   | 33.1               |
| 10   | Exhausted-Rest   HCR,Young | 38.1               |
| 11   | Exhausted-Rest   LCR,Old   | 32.5               |
| 12   | Exhausted-Rest   LCR,Young | 28.4               |

## Supplementary Figure 2. Euclidean distances between groups.

Left panels highlight individual comparisons in the cube depiction. (a) Effects of genetic background: HCR vs. LCR (sides 2, 4, 6, and 8); (b) Effects of aging: old vs young (sides 1, 3, 5, and 7); (c) Effects of exercise: exhaustion vs. rest (sides 9, 10, 11, and 12). In expression such as (HCR-LCR|Old, Exhausted), "|" is the mathematical notation of "conditional on", indicating the specific strata in which the contrast is defined.

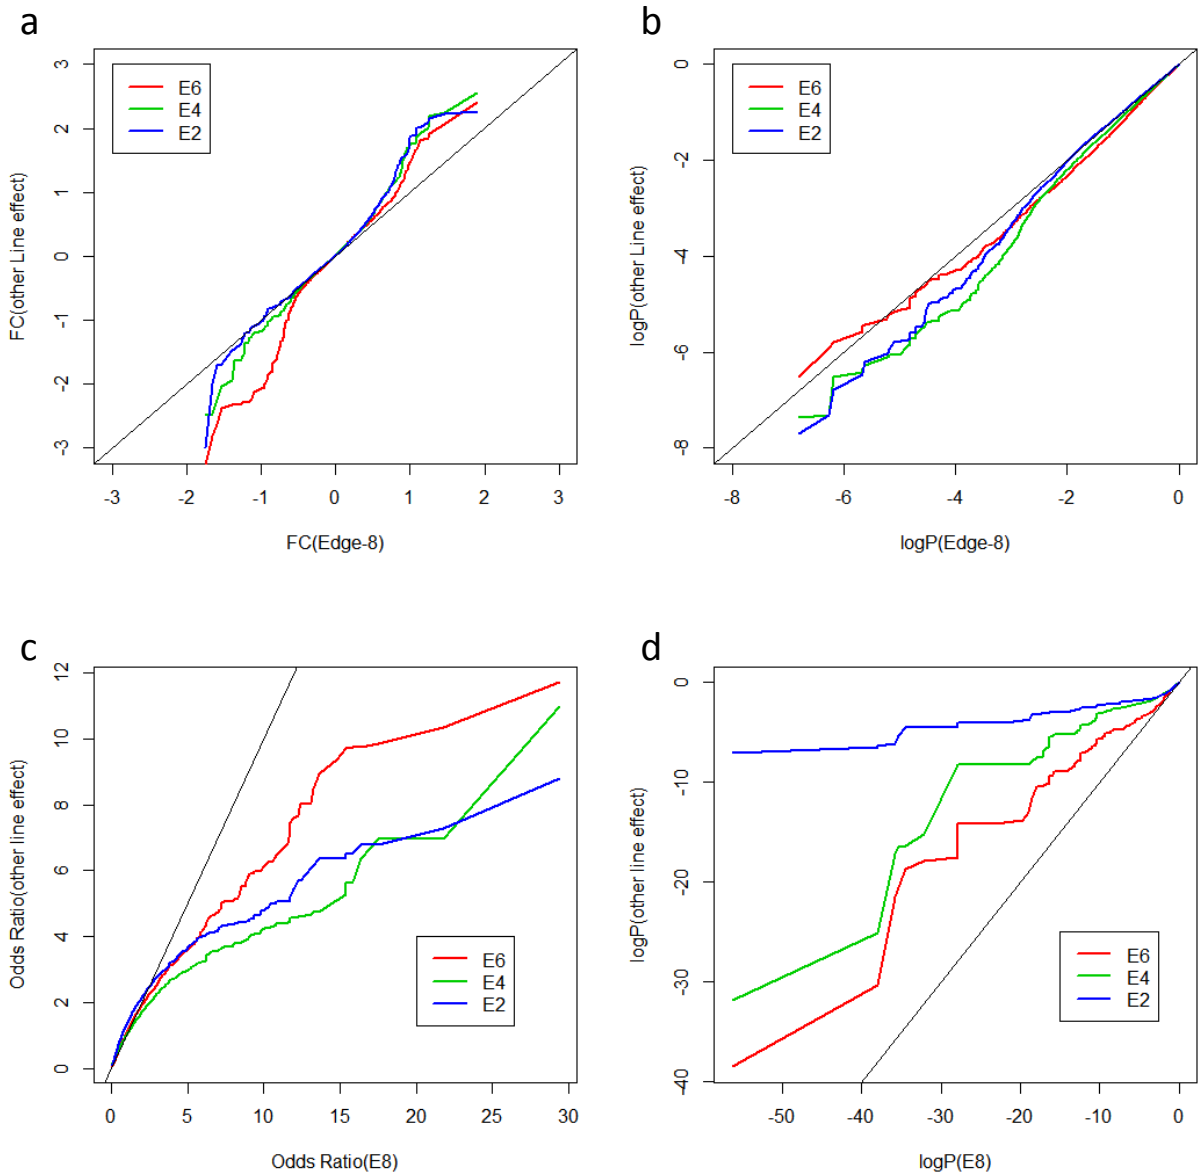

### Supplementary Figure 3. Comparison between E8 and the other three line effects (E6, E4, E2).

qq-plots for fold-change (a) and logP (b) in 19,607 genes showing that E8 tends to have smaller effect and less significance at the gene level. qq-plots for odds ratio (c) and logP (d) for 4,146 pathways, showing that E8 tends to have stronger and more significant pathway-level signals.

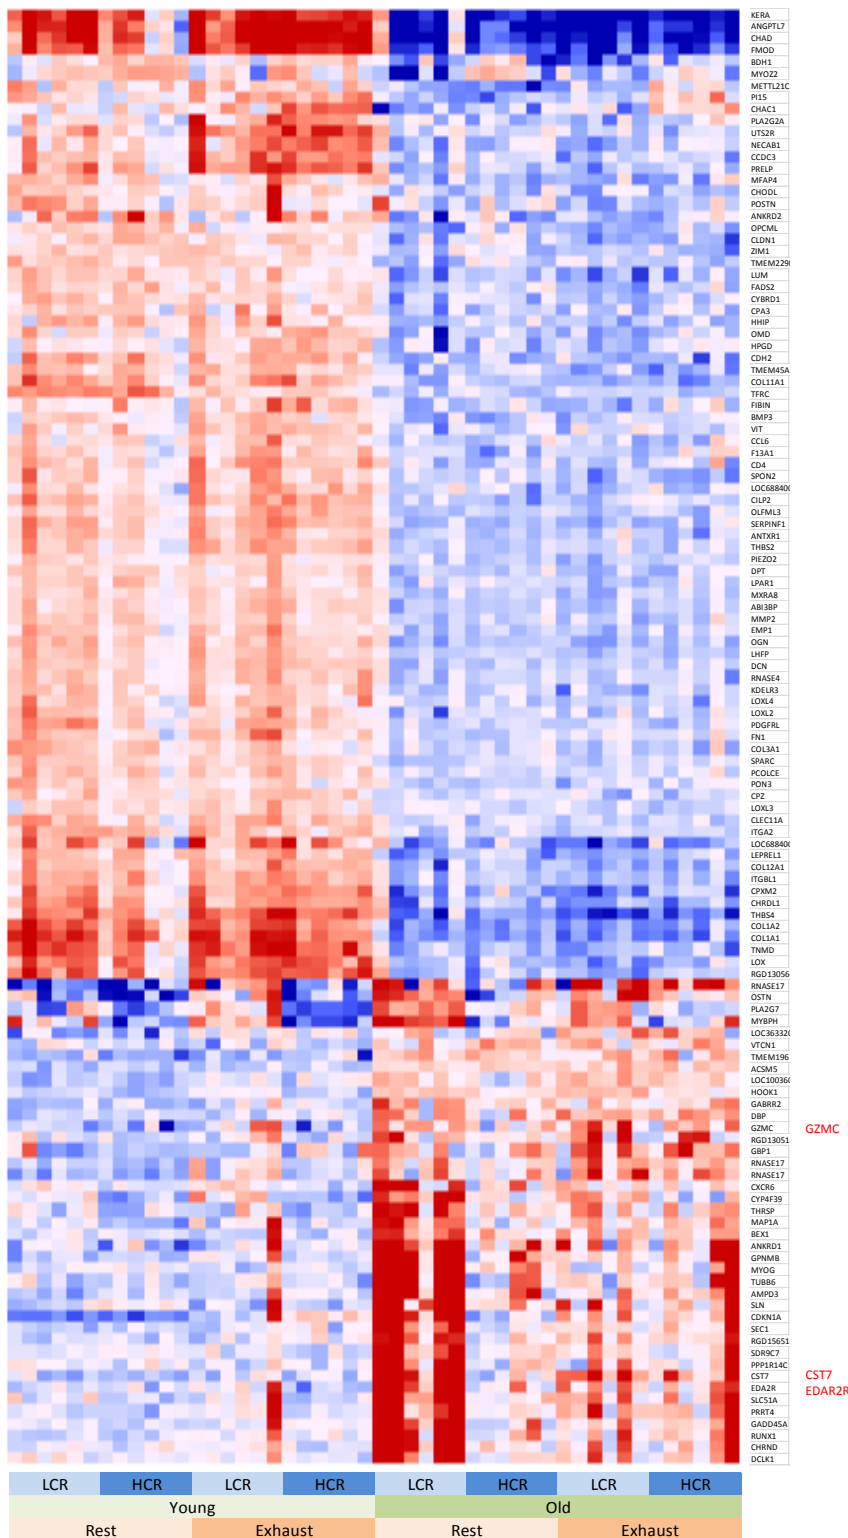

## Supplementary Figure 4.

Similar to Figure 3, shown are 123 genes with the largest "Age" effect, satisfying  $FDR < 0.05$  and greater than 60% fold change in either direction.

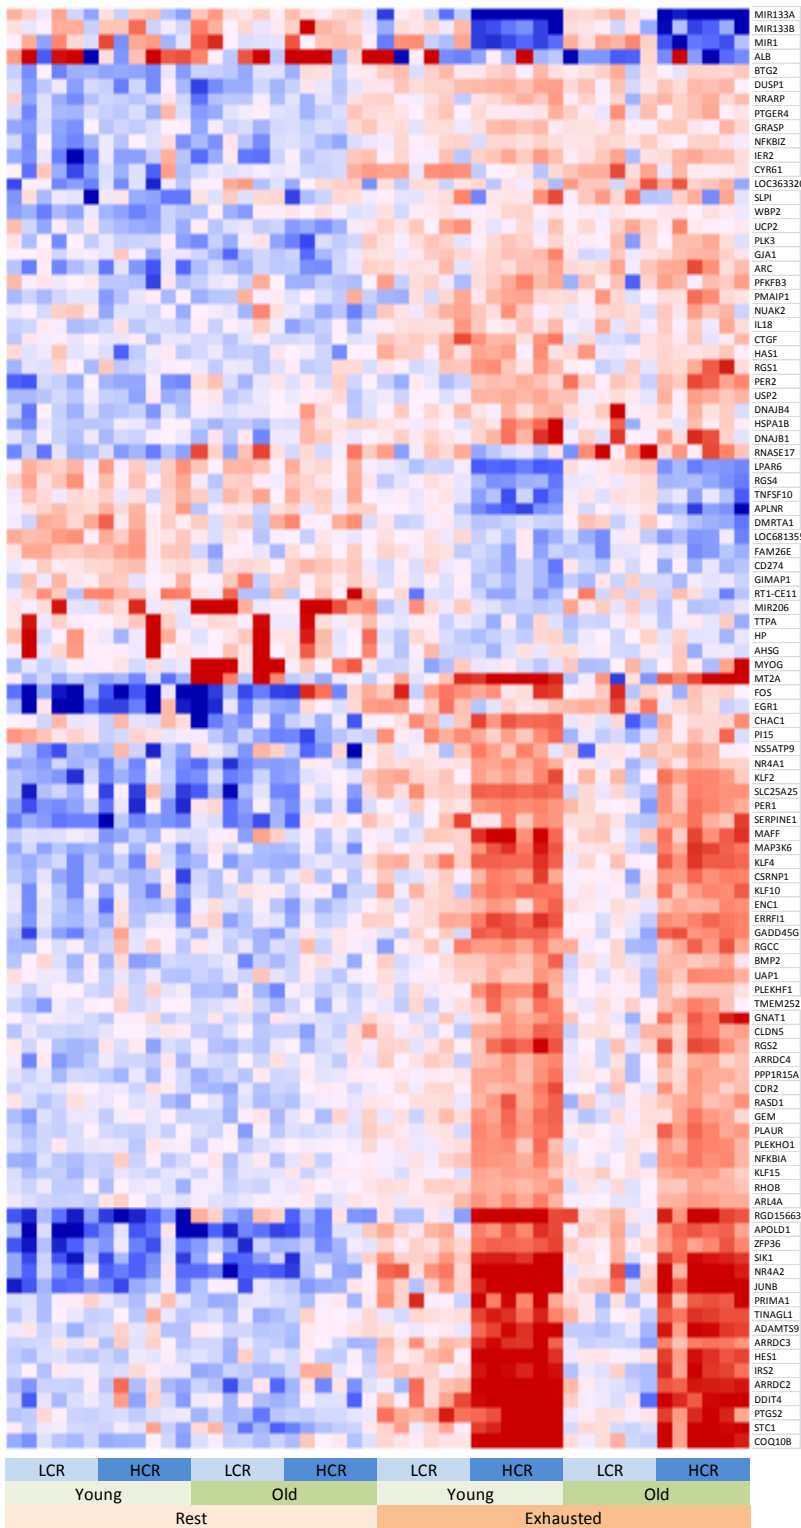

## Supplementary Figure 5.

Similar to Figure 3, shown are 102 genes with the largest "Exercise" effect, satisfying FDR < 0.05 and greater than 50% fold change in either direction.

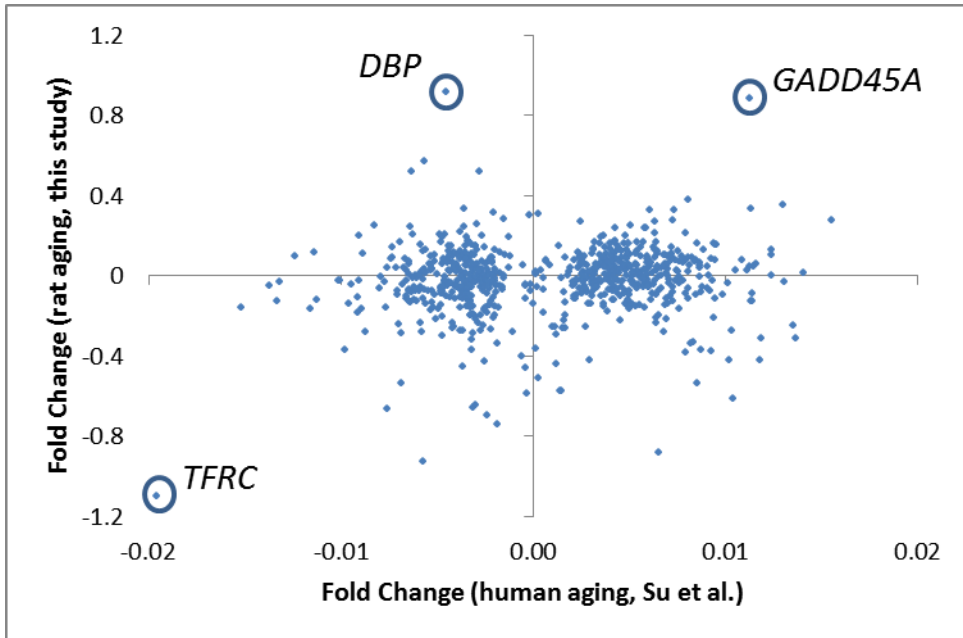

### Supplementary Figure 6.

Comparison of fold change of aging effect between a human skeletal muscle meta-analysis (Su et al. 2015) and our study of HCR-LCR rats.
